# Supplementary material for: Molecular insertion regulates the donor-acceptor interactions in cocrystals for the design of piezochromic luminescent materials
Source: Research Square preprint supplement (doi:10.21203/rs.3.rs-226341/v1), 2021-02-25
Supplement: Supplementary file 1 [file 2687af81a0e44bef86598986.pdf]

# Supporting Information

## **Molecular insertion regulates the donor-acceptor interactions in cocrystals for the design of piezochromic luminescent materials**

Chunguang Zhai<sup>1</sup>, Xiu Yin<sup>1</sup>, Shifeng Niu<sup>1</sup>, Mingguang Yao<sup>\*,1</sup>, Shuhe Hu<sup>1</sup>,  
Jiajun Dong<sup>1</sup>, Yuchen Shang<sup>1</sup>, Zhigang Wang<sup>2</sup>, Qianjun Li<sup>1</sup>, Bertil  
Sundqvist<sup>1,3</sup> & Bingbing Liu<sup>\*,1</sup>

<sup>1</sup> State Key Laboratory of Superhard Materials, College of Physics, Jilin  
University, Changchun 130012, China

<sup>2</sup> Institute of Atomic and Molecular Physics, Jilin University, Changchun  
130012, China

<sup>3</sup> Department of Physics, Umeå University, SE-90187 Umeå, Sweden

Contacts:

yaomg@jlu.edu.cn;

liubb@jlu.edu.cn

|                                          |                                    |                                    |
|------------------------------------------|------------------------------------|------------------------------------|
| <b><i>Compound Name</i></b>              | <b><i>PTCs</i></b>                 | <b><i>PTCs-THF</i></b>             |
| <b><i>Space Group</i></b>                | <b>P 21/c</b>                      | <b>C 2/M</b>                       |
| <b><i>Cell Lengths(Å)</i></b>            | <b>a = 7.889</b>                   | <b>a = 13.205</b>                  |
|                                          | <b>b = 30.004</b>                  | <b>b = 14.569</b>                  |
|                                          | <b>c = 8.936</b>                   | <b>c = 7.9733</b>                  |
| <b><i>Cell Angles (°)</i></b>            | <b><math>\alpha = 90</math></b>    | <b><math>\alpha = 90</math></b>    |
|                                          | <b><math>\beta = 91.493</math></b> | <b><math>\beta = 97.083</math></b> |
|                                          | <b><math>\gamma = 90</math></b>    | <b><math>\gamma = 90</math></b>    |
| <b><i>Cell Volume(Å<sup>3</sup>)</i></b> | <b>2114.5</b>                      | <b>1522.2</b>                      |

23

24 **Supplementary Table 1.** Crystallographic data for PTCs and  
25 PTCs-THF obtained from our experiments.

26

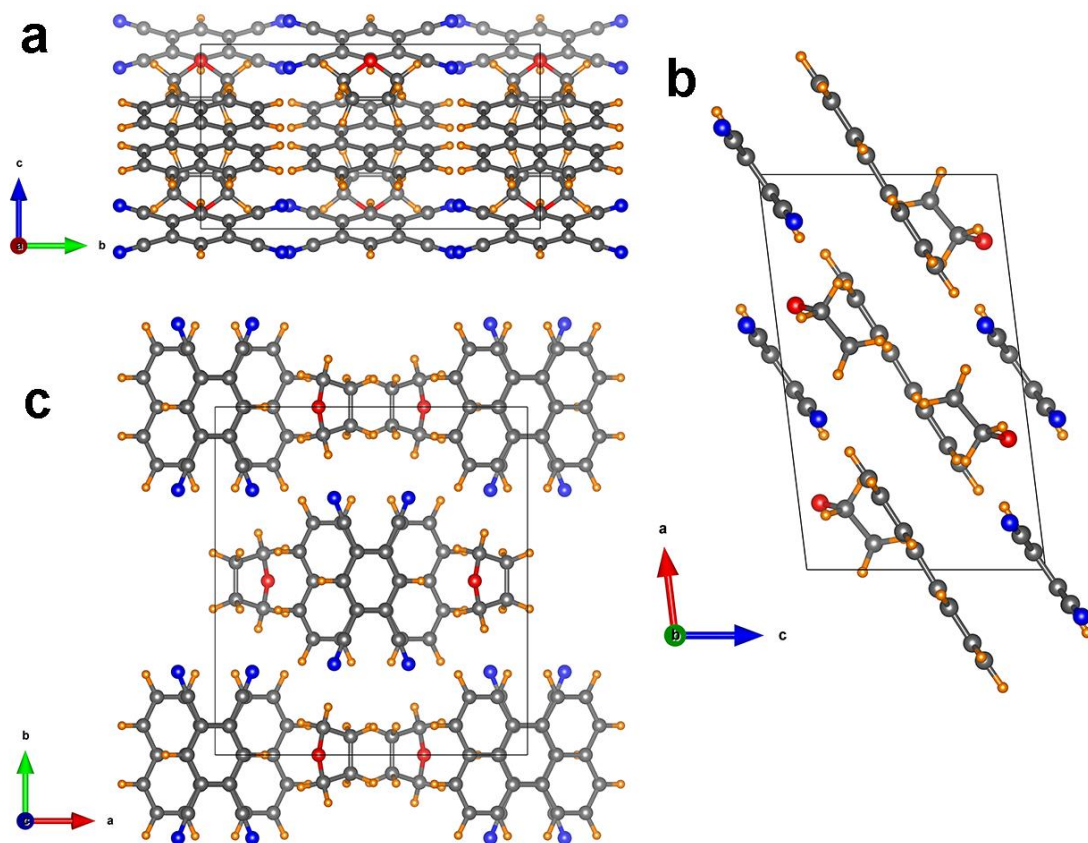

**Supplementary Figure 1.** Molecular packing of PTCs-THF perpendicular to the **a)** *a*-, **b)** *b*-, and **c)** *c*-axis.

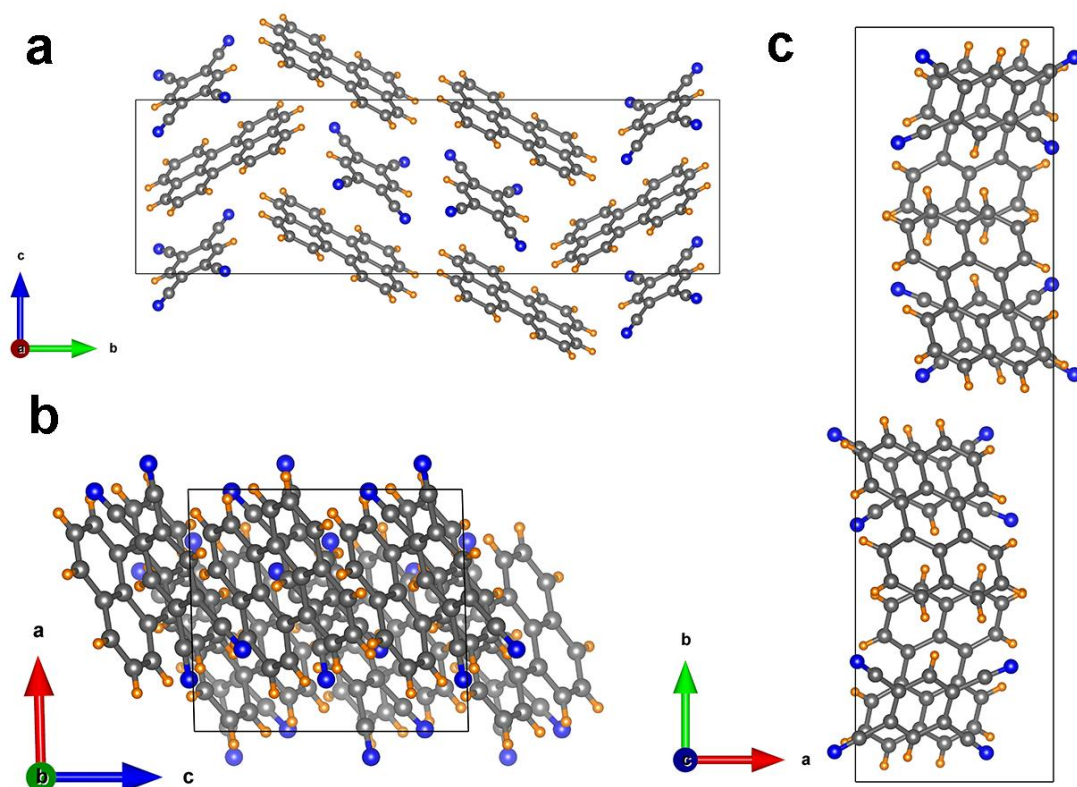

**Supplementary Figure 2.** Molecular packing of perylene-TCNB cocrystals (PTCs) perpendicular to the **a)** *a*-, **b)** *b*-, and **c)** *c*-axis.

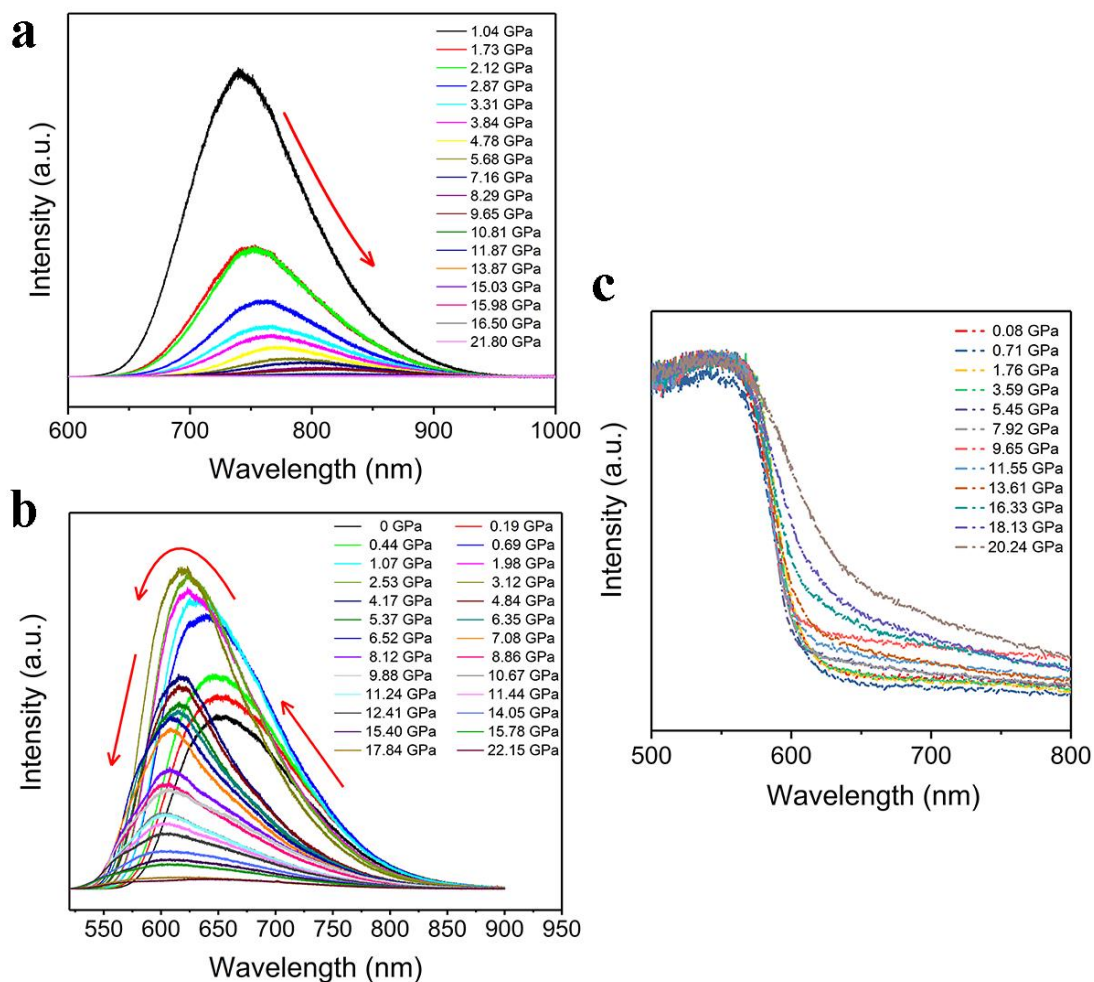

**Supplementary Figure 3.** a) PL spectra of PTCs under pressure up to 21.80 GPa. b) PL spectra of PTCs-THF up to 22.15 GPa. c) *In situ* UV-vis absorption spectra of PTCs-THF up to 20.24 GPa.

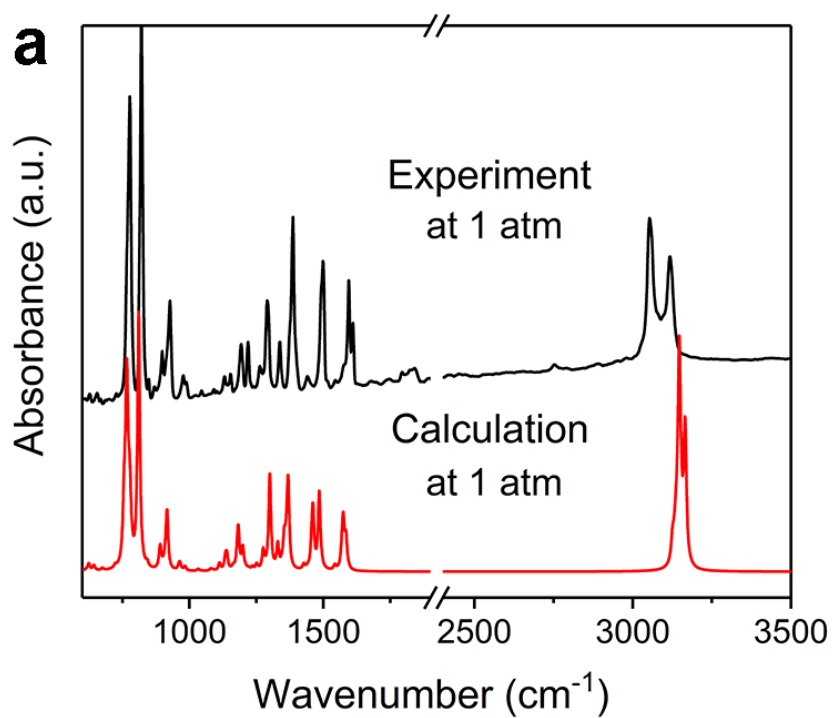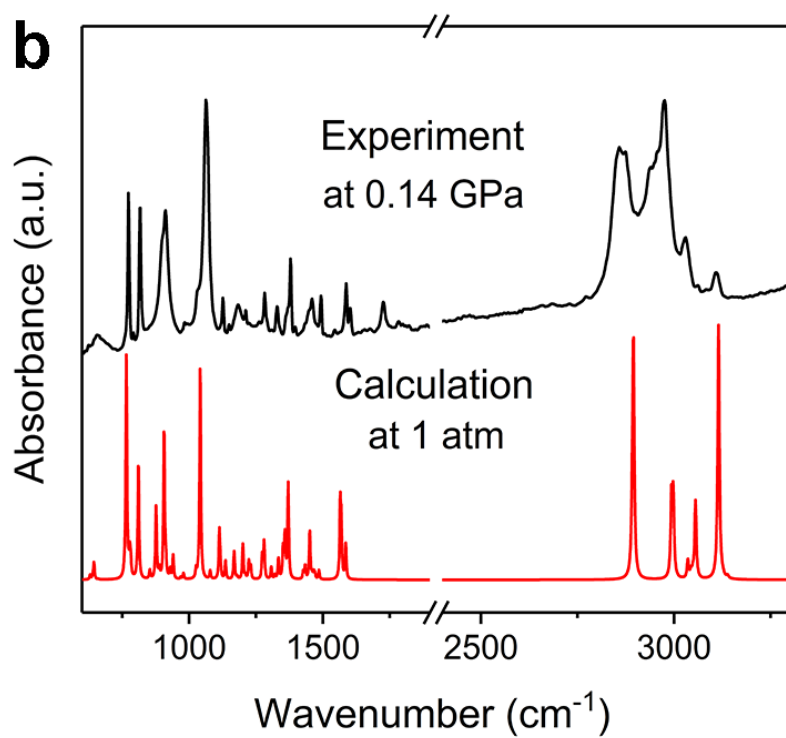

**Supplementary Figure 4. a)** Experimental (top) and calculated (bottom) IR spectra of PTCs. **b)** Experimental (top) and calculated (bottom) IR spectra of PTCs-THF.

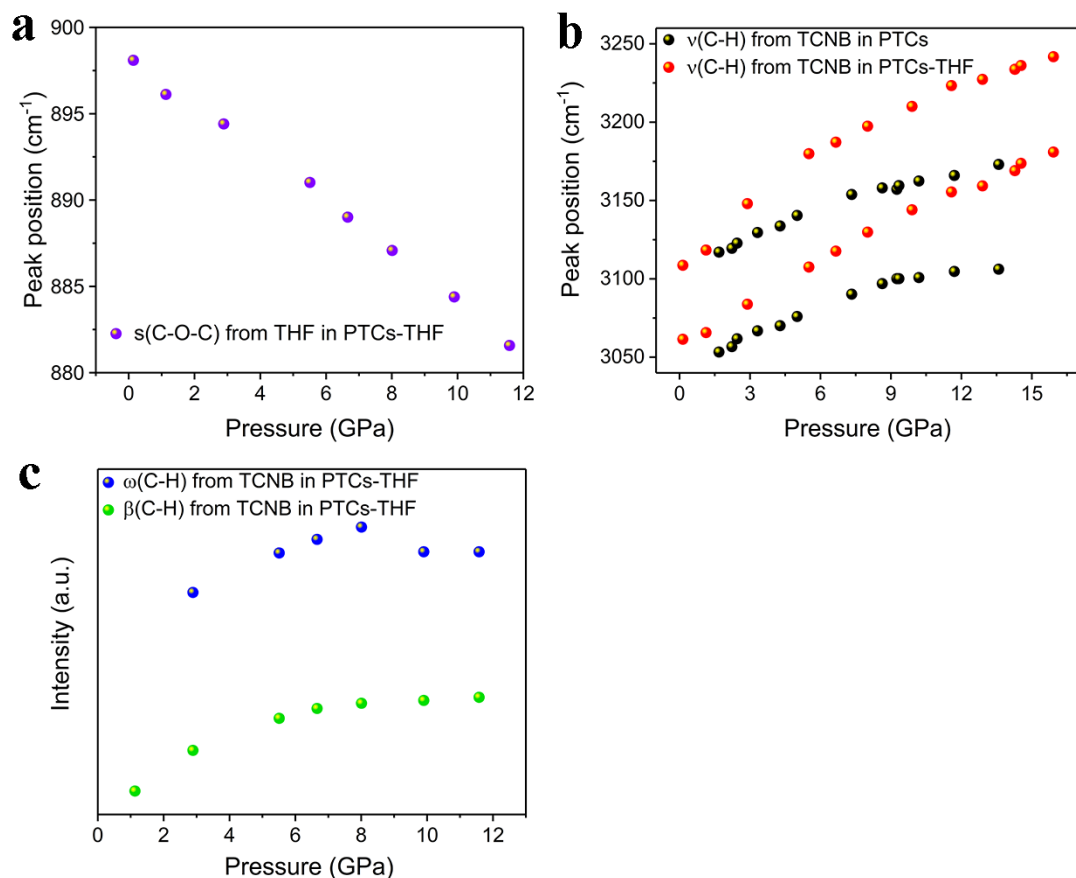

**Supplementary Figure 5. The pressure dependence of the peak positions and intensities for some selected IR modes for PTCs-THF and PTCs.** The pressure dependence of the peak position for **a)** C-O-C symmetrical stretching vibration s(C-O-C) from THF in PTCs-THF; **b)** C-H stretching vibration v(C-H) from TCNB; **c)** the pressure dependence of peak intensity for C-H wagging vibrations  $\omega$ (C-H) and C-H bending vibrations  $\beta$ (C-H) from TCNB in PTCs-THF.

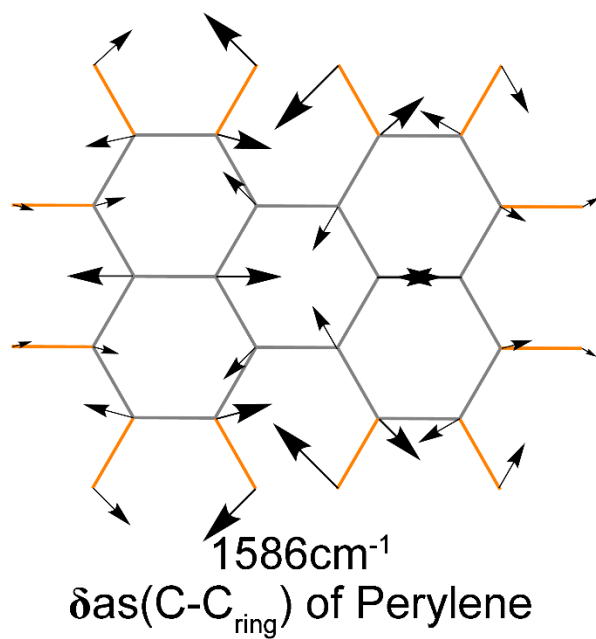

**Supplementary Figure 6.** The IR vibration at 1586 cm<sup>-1</sup> is from the asymmetrical deformation vibrations  $\delta_{as}(\text{C-C}_{\text{ring}})$  of perylene. The size of the arrow represents the amplitude of the vibration.



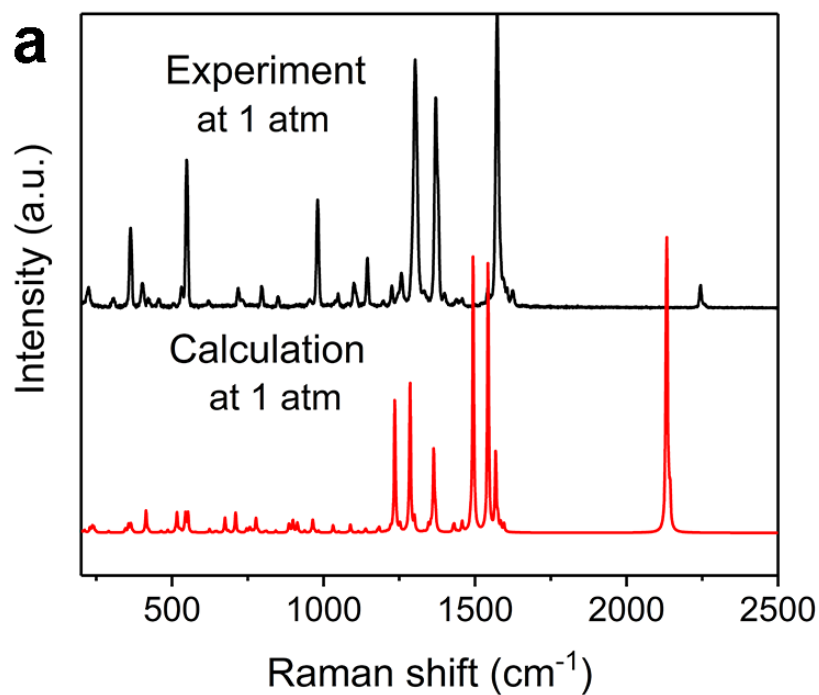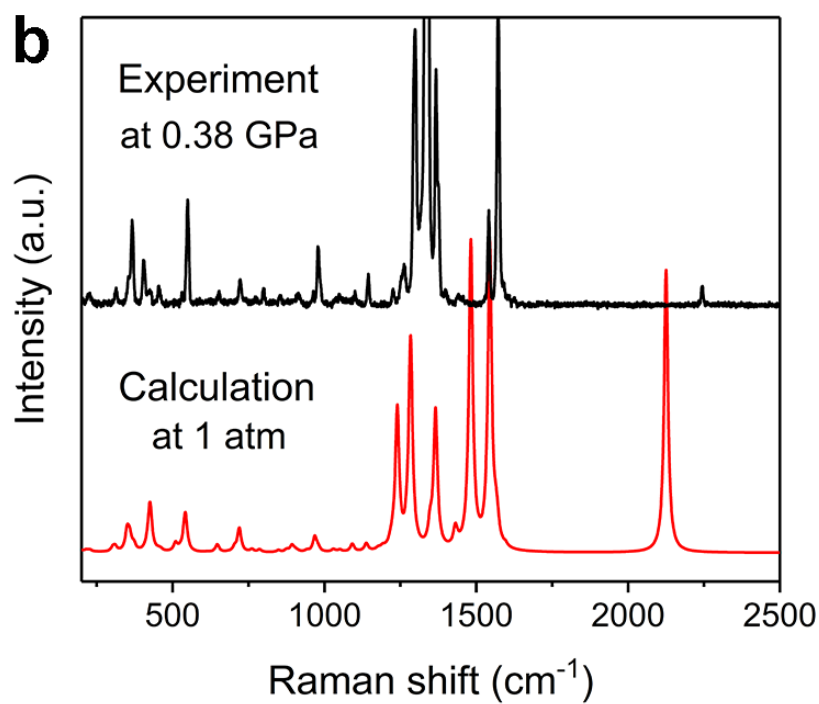

**Supplementary Figure 7. a)** Experimental (top) and calculated (bottom) Raman spectra of PTCs. **b)** Experimental (top) and calculated (bottom) Raman spectra of PTCs-THF.

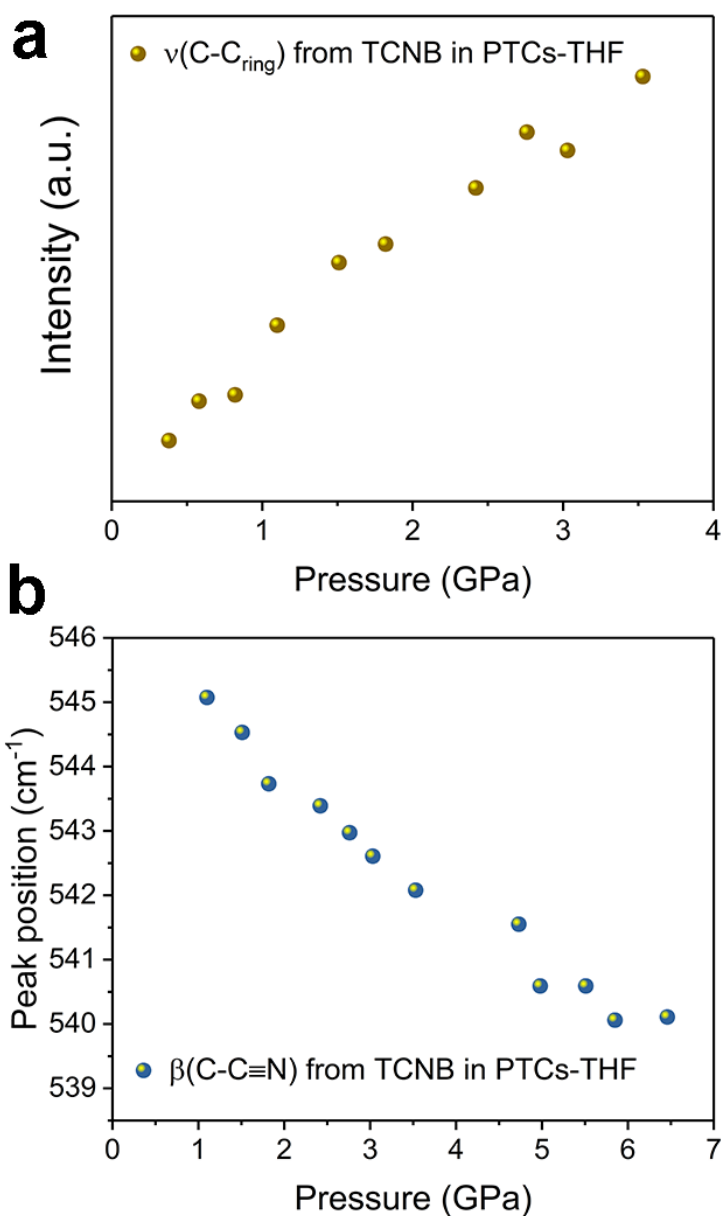

**Supplementary Figure 8. The pressure dependence of the peak positions and intensities for some selected Raman modes of PTCs-THF. The dependence of a) peak intensity for the carbon ring stretching vibration  $\nu(\text{C-C}_{\text{ring}})$ , and b) peak position for the C-C $\equiv$ N in-plane bending vibration  $\beta(\text{C-C}\equiv\text{N})$  from TCNB.**

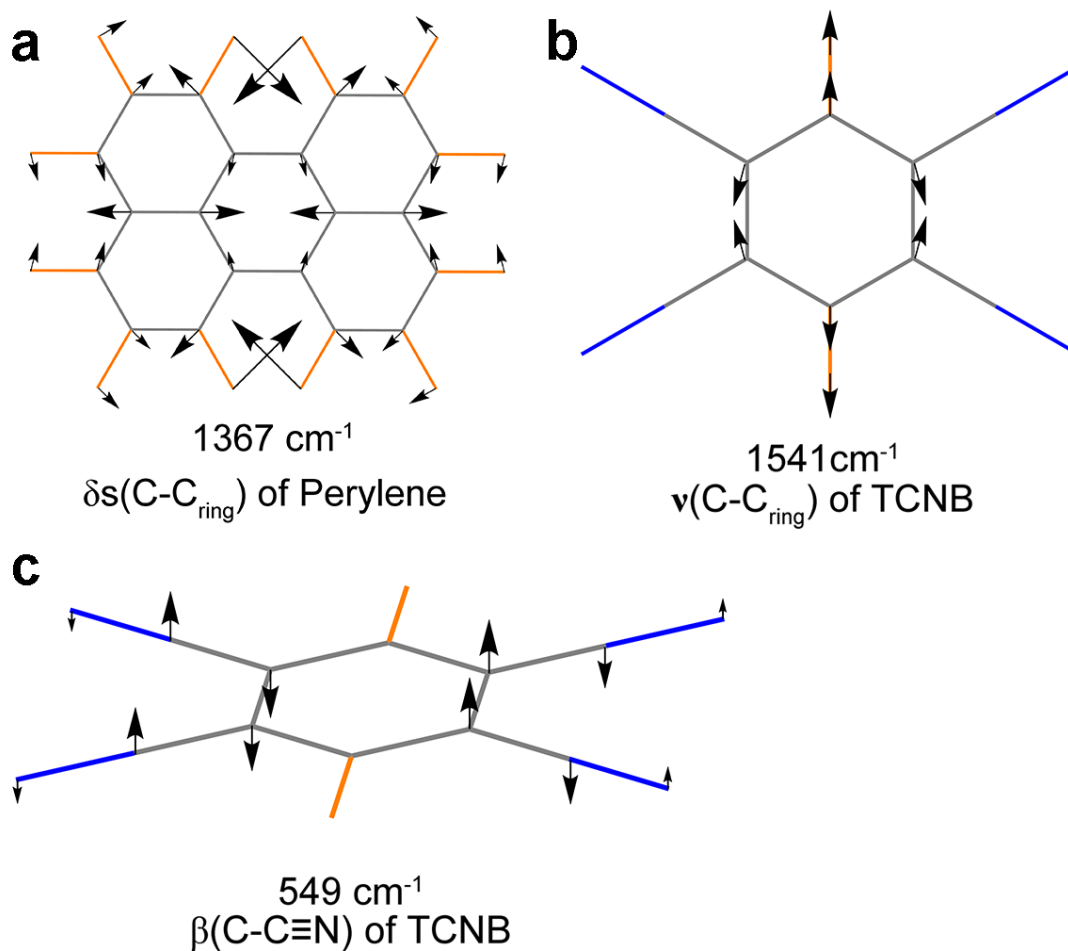

**Supplementary Figure 9. The sketch maps for the Raman vibrations.**

**a)** the symmetrical deformation vibrations  $\delta s(\text{C-C}_{\text{ring}})$  of perylene at 1367 cm<sup>-1</sup>; **b)** the carbon ring stretching vibration  $\nu(\text{C-C}_{\text{ring}})$  of TCNB at 1541 cm<sup>-1</sup>; **c)** out-of-plane bending vibration  $\beta(\text{C-C}\equiv\text{N})$  of TCNB at 549 cm<sup>-1</sup>.

The size of the arrow represents the amplitude of the vibration.

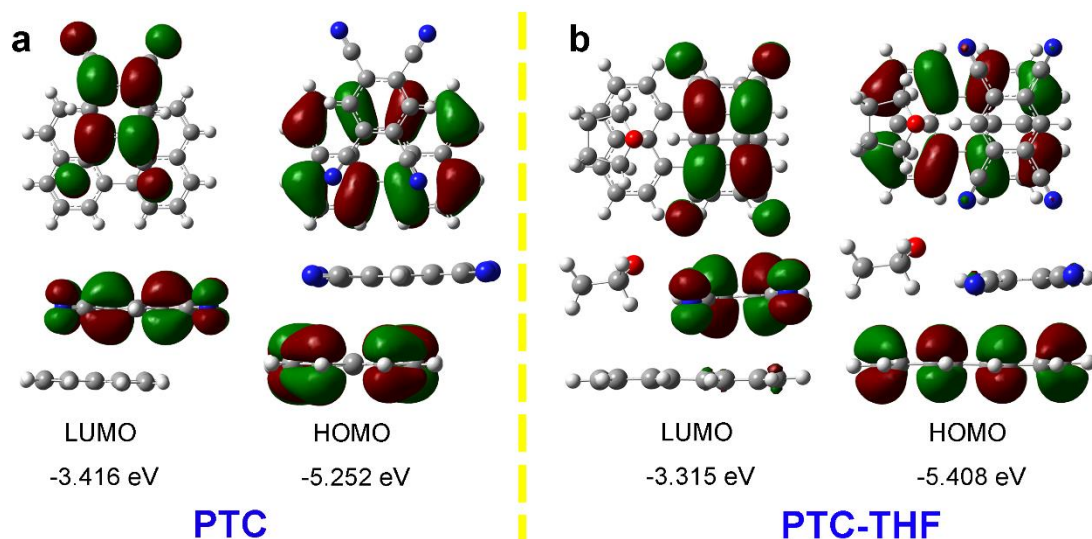

**Supplementary Figure 10.** Frontier orbital diagrams of the **a)** PTC and **b)** PTC-THF calculated by the density functional theory (DFT) method at B3LYP/6-31G (d, p).

94

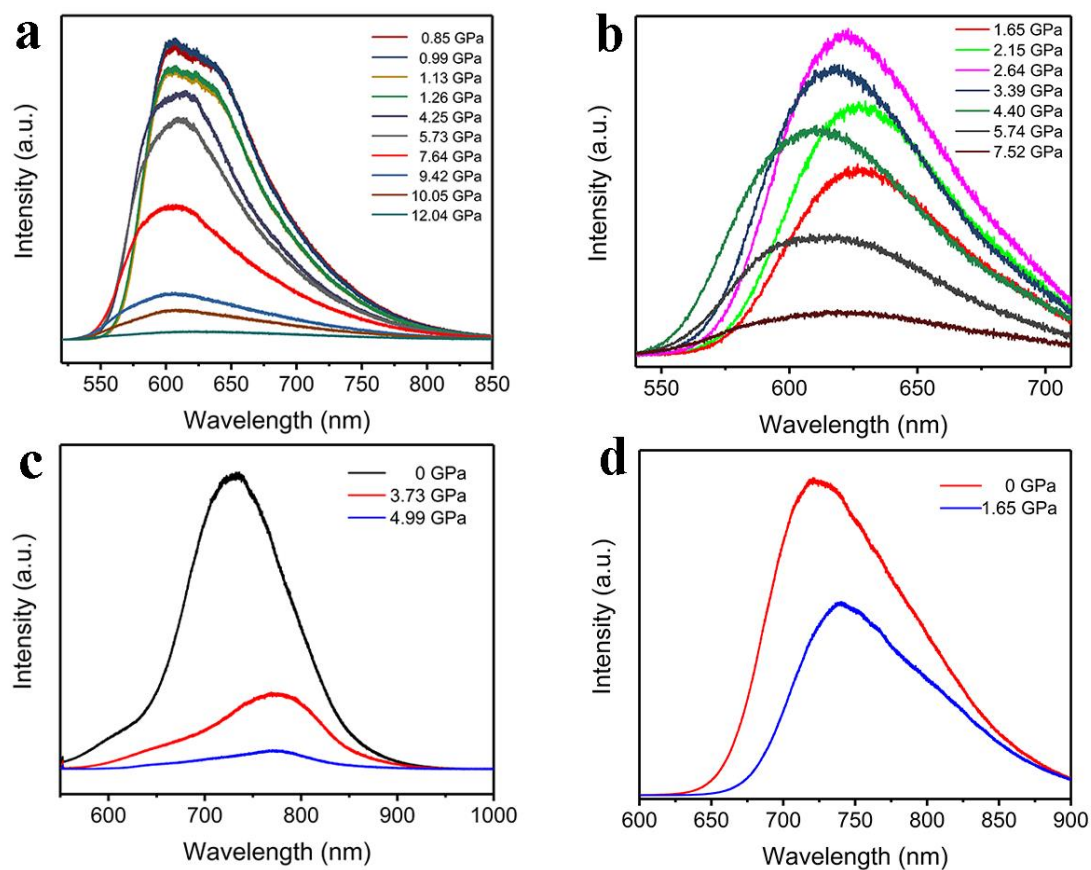

95

96

97 **Supplementary Figure 11.** PL spectra of perylene-TCNB cocrystals  
 98 soaked in **a)** 1,4-dioxane, **b)** pyridine, **c)**  $\text{CCl}_4$  and **d)** m-xylene.

99
